# Supplementary material for: RETRACTED: Curative Effect of Catechin Isolated from Elaeagnus Umbellata Thunb. Berries for Diabetes and Related Complications in Streptozotocin-Induced Diabetic Rats Model
Source: MDPI journal article supplement (doi:10.3390/molecules26010137), 2020-12-30
Supplement: s1 [file s1]

## Supplementary material

### Figures and Tables

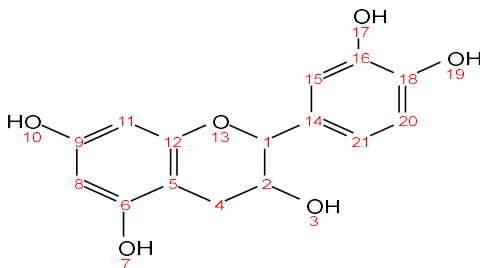

**Figure S1:** Structural formula of catechin

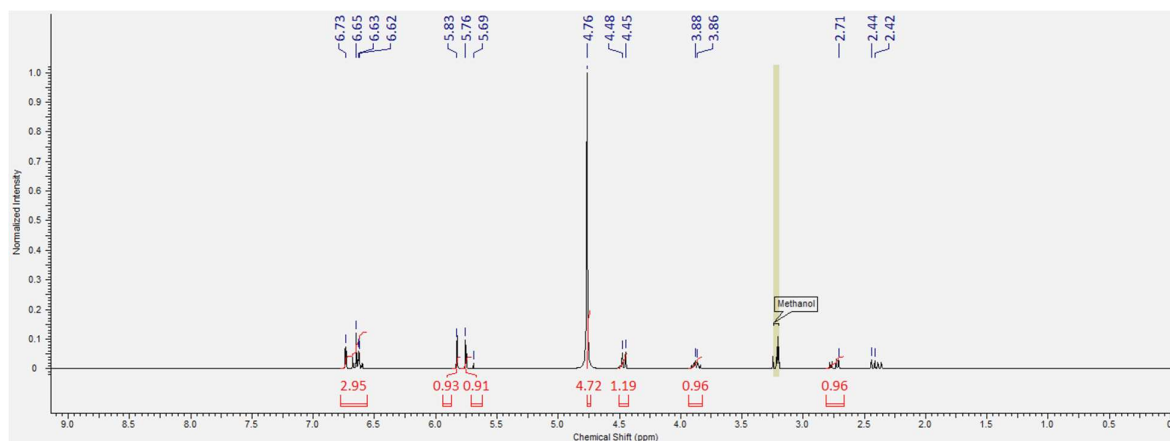

**Figure S2:** <sup>1</sup>H NMR (METHANOL-d<sub>4</sub>, 300MHz) of isolated compound catechin

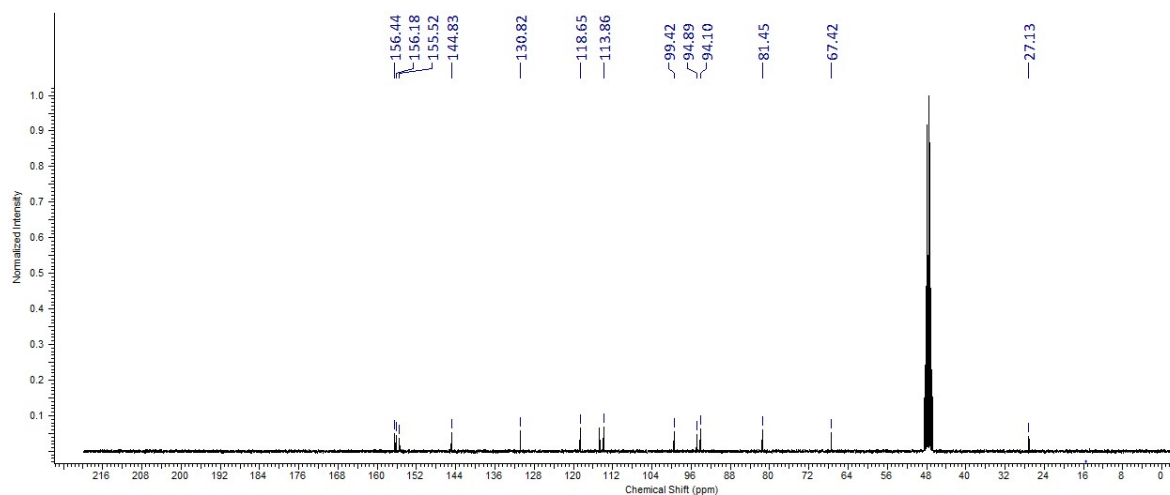

**Figure S3:** <sup>13</sup>C NMR (METHANOL-d<sub>4</sub>, 75MHz) of isolated compound catechin

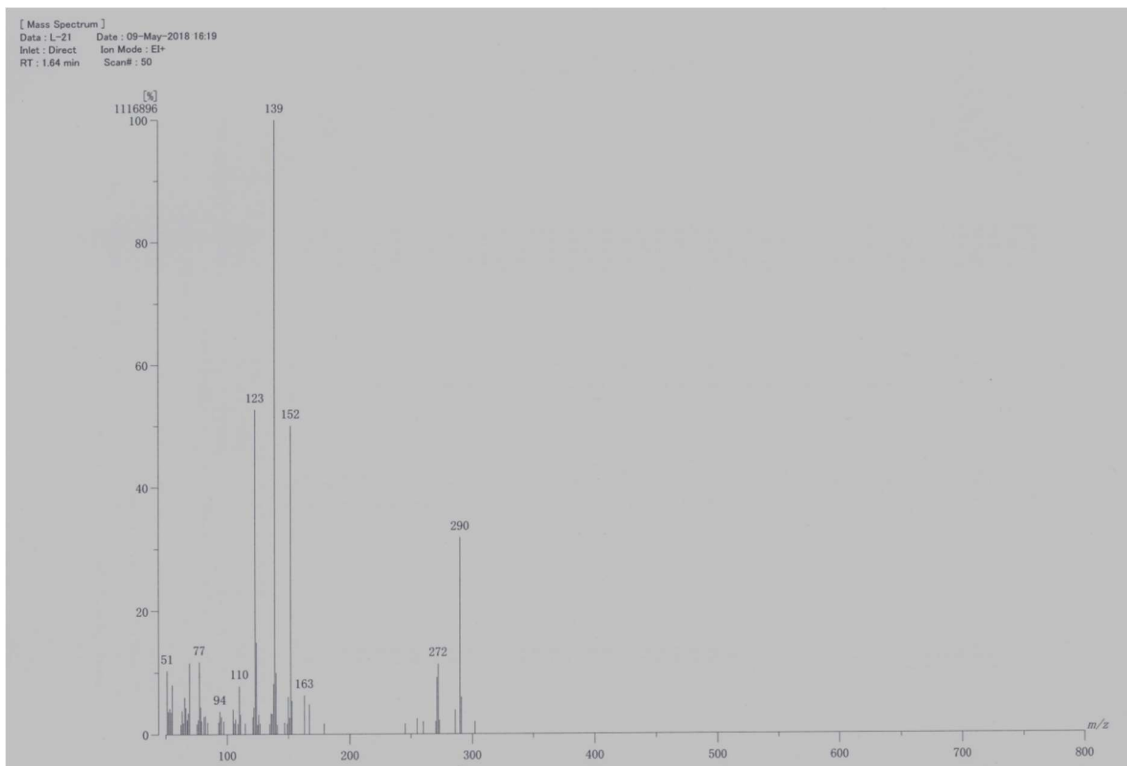

Figure S4: EIMS of isolated compound catechin

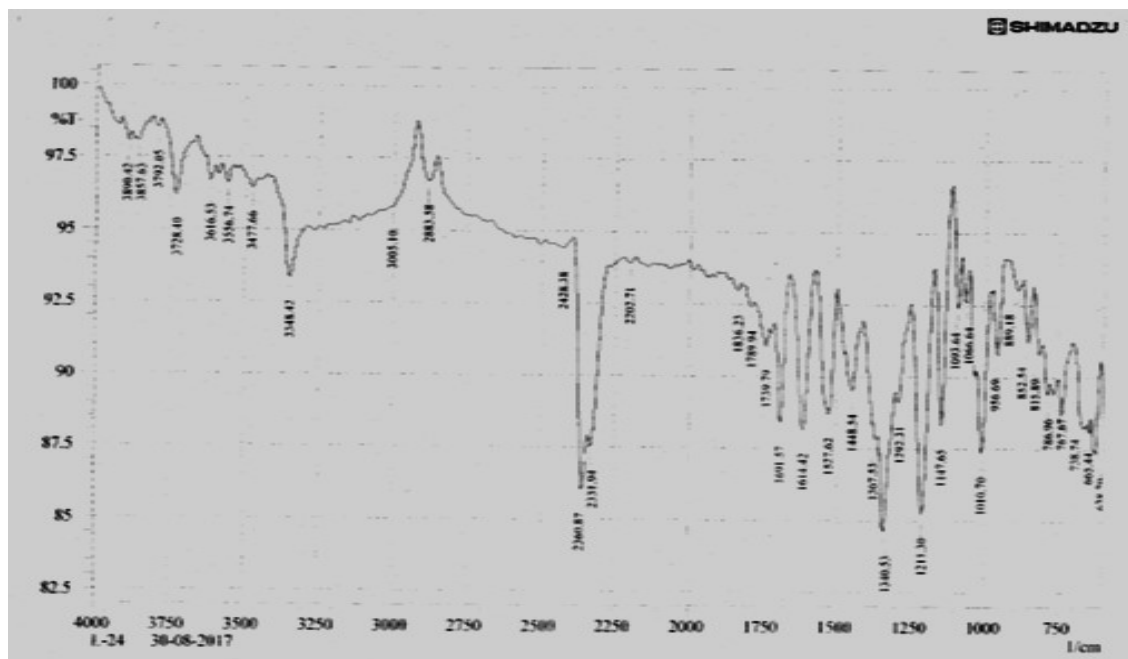

Figure S5: FTIR spectra of isolated compound catechin

**Table S1.** % DPPH and ABTS free radical scavenging activity of catechin isolated from *Elaeagnus umbellata* fruit at various concentrations.

| Samples       | Concentration (µg/mL) | %DPPH scavenging Mean ±SEM | IC <sub>50</sub> (µg/mL) | %ABTS scavenging Mean ± SEM | IC <sub>50</sub> (µg/mL) |
|---------------|-----------------------|----------------------------|--------------------------|-----------------------------|--------------------------|
| CTN           | 1000                  | 65±1.35***                 | 67                       | 59±1.5**                    | 72                       |
|               | 500                   | 50±1.1***                  |                          | 46±1.8***                   |                          |
|               | 250                   | 44±0.5***                  |                          | 41±0.8***                   |                          |
|               | 125                   | 37±0.4***                  |                          | 36±1.4***                   |                          |
|               | 62.5                  | 31±1.0***                  |                          | 28±1.2***                   |                          |
|               | 31.25                 | 29± 1.4***                 |                          | 21±1.5***                   |                          |
| Ascorbic acid | 1000                  | 86±0.5                     | 30                       | 85±0.5                      | 32                       |
|               | 500                   | 77±1.0                     |                          | 80±1.1                      |                          |
|               | 250                   | 80±0.4                     |                          | 78±0.5                      |                          |
|               | 125                   | 77±0.7                     |                          | 70±1.3                      |                          |
|               | 62.5                  | 73±1.2                     |                          | 64±1.1                      |                          |
|               | 31.25                 | 69±0.8                     |                          | 56±0.4                      |                          |

CTN, Catechin. Note: The data is represented as Mean ± SEM, n=3. Values are significantly different as compared to positive control \*P< 0.05, \*\*P< 0.01, \*\*\*P< 0.001.

**Table S2.** % α-amylase and α-glucosidase inhibition potential of catechin isolated from of *Elaeagnus umbellata* fruit at various concentrations.

| S.No | Sample            | Concentration (µg/mL) | % α-amylase inhibition | α-amylase IC <sub>50</sub> µg/mL | % α-glucosidase inhibition | α-glucosidase IC <sub>50</sub> µg/mL |
|------|-------------------|-----------------------|------------------------|----------------------------------|----------------------------|--------------------------------------|
|      |                   |                       | Mean ± SEM             |                                  | Mean ± SEM                 |                                      |
| 1    | CTN               | 1000                  | 83±0.8***              | 38                               | 85±1.5***                  | 32                                   |
|      |                   | 500                   | 77±0.5***              |                                  | 77±0.4***                  |                                      |
|      |                   | 250                   | 69±1.5***              |                                  | 70±0.8***                  |                                      |
|      |                   | 125                   | 63±1.8***              |                                  | 66±0.5***                  |                                      |
|      |                   | 62.5                  | 54±0.5***              |                                  | 58±1.8***                  |                                      |
|      |                   | 31.05                 | 45±1.4***              |                                  | 50±1.5***                  |                                      |
| 2    | Standard Acarbose | 1000                  | 90±1.1                 | 30                               | 89±0.4                     | 26                                   |
|      |                   | 500                   | 83±0.8                 |                                  | 82±0.8                     |                                      |
|      |                   | 250                   | 75±0.2                 |                                  | 77±0.5                     |                                      |
|      |                   | 125                   | 69±0.5                 |                                  | 71±1.1                     |                                      |
|      |                   | 62.5                  | 62±0.2                 |                                  | 68±0.6                     |                                      |
|      |                   | 31.05                 | 48±1.2                 |                                  | 60±0.3                     |                                      |

CTN, Catechin. Note: The data is represented as Mean  $\pm$  SEM, n=3. Values are significantly different as compared to positive control \*P<0.05, \*\*P<0.01, \*\*\*P<0.001.
